# Supplementary figures and images for: Equilibrium and structural studies of complexes with a hexadentate ligand containing amide, amine and pyridyl nitrogen donors. Crystal structures of copper(ii), nickel(ii) and cobalt(iii) complexes
Source: Royal Society of Chemistry journal article supplement (doi:10.1039/b111614b), 2002-01-01

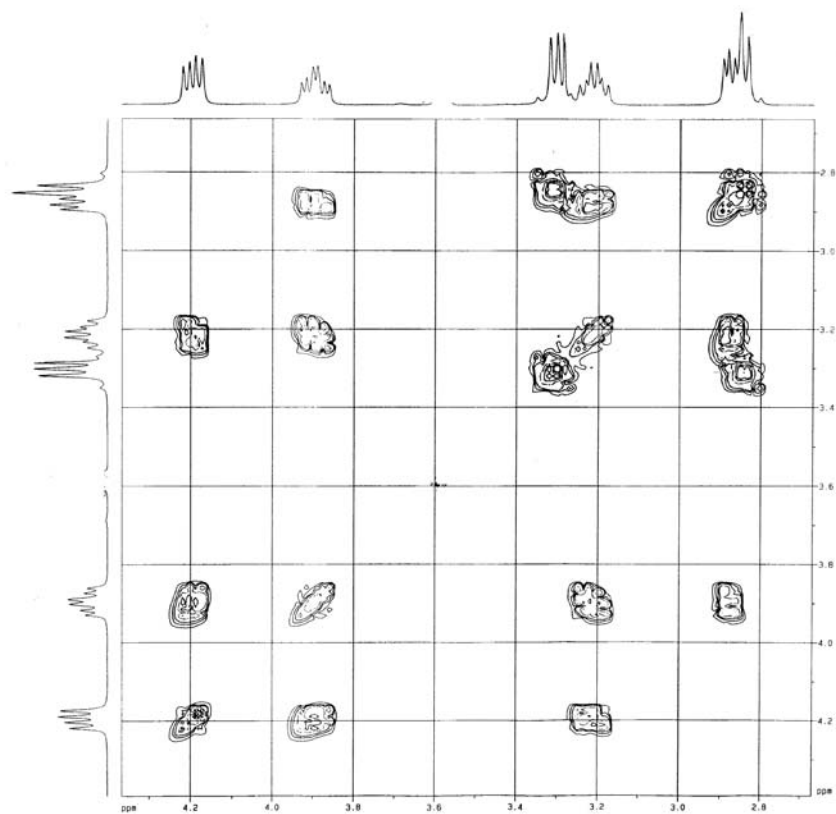

Cosy spectrum of the aliphatic chain in  $[\text{CoLH}_2](\text{ClO}_4)_{0.75}\text{Cl}_{0.25}$  in  $\text{D}_2\text{O}$ .

Supplement: b111614b.pdf [file b111614b.pdf]
